# Supplementary material
Source: publisher figshare collection journal article supplement (https://sage.figshare.com/ndownloader/files/23581454)
Supplement: Supplementary file 1 [file 23581454]

## KNOWLEDGE LEVEL FORM

|                             |  |                           |  |
|-----------------------------|--|---------------------------|--|
| <b>Participant No</b>       |  | <b>Date</b>               |  |
| <b>Control Group</b>        |  | <b>Experimental Group</b> |  |
| <b>Patient Name Surname</b> |  | <b>Protocol No</b>        |  |

| <b>FALL PREVENTION</b>                                                                                                                                    | <b>True</b> | <b>False</b> |
|-----------------------------------------------------------------------------------------------------------------------------------------------------------|-------------|--------------|
| 1. There must be enough lighting in your home.                                                                                                            |             |              |
| 2. There is no need to have an easy-to-access lamp at your bedside.                                                                                       |             |              |
| 3. Your bed height should not be adjusted according to your height.                                                                                       |             |              |
| 4. A non-slip floor covering should be used.                                                                                                              |             |              |
| 5. Small carpets should not be used.                                                                                                                      |             |              |
| 6. Carpets should be fixed on the floor to prevent them from slipping.                                                                                    |             |              |
| 7. You should not walk in the house with non-slip sole slippers / shoes.                                                                                  |             |              |
| 8. You should walk around barefoot at home.                                                                                                               |             |              |
| 9. If there are stairs in your home, the soundness of the steps should be checked for security.                                                           |             |              |
| 10. There may be objects on stairs that cause slipping, such as carpet.                                                                                   |             |              |
| 11. Items such as ornaments, cables, extension lines, telephones, etc. that can cause a tripping hazard should be removed or fixed from the walking area. |             |              |
| 12. Wet floors should not be dried immediately with a long-handled mop.                                                                                   |             |              |
| 13. Regular exercise strengthens balance and coordination and accelerates adaptation to normal daily life.                                                |             |              |
| <b>WOUND CARE</b>                                                                                                                                         |             |              |
| 14. You need to dress the surgical wounds.                                                                                                                |             |              |
| 15. After discharge, shower should be taken with warm water and soap.                                                                                     |             |              |
| 16. Bath / shower should not be done without rubbing the wound places with products such as pouch and fiber.                                              |             |              |
| 17. Effective cleansing accelerates healing in wound care and prevents infection.                                                                         |             |              |

|                                                                                                                                                                                             |  |  |
|---------------------------------------------------------------------------------------------------------------------------------------------------------------------------------------------|--|--|
| 18. There is no tension, pain, or numbness at the incision site in the postoperative period.                                                                                                |  |  |
| 19. The incision area should be checked daily for signs of infection such as redness, opening, bad smell, swelling, discharge, and fever.                                                   |  |  |
| <b>TRIFLOW EXERCISES</b>                                                                                                                                                                    |  |  |
| 20. After your surgery, breathing exercises should be done with triflow so that your lungs can breathe as before and reach their preoperative capacity.                                     |  |  |
| 21. It does not require time and practice to rehab the lungs after they are deflated during surgery.                                                                                        |  |  |
| 22. Triflow breathing exercises should be done by taking long, deep breaths into the lungs from a mouthpiece, then completely emptying the lungs. This should be done 10-15 times per hour. |  |  |
| 23. The number of moving balls will decrease as you continue the exercises.                                                                                                                 |  |  |
| <b>NUTRITION</b>                                                                                                                                                                            |  |  |
| 24. Adequate, balanced, and regular nutrition will allow your wound to heal quickly and will enable you to maintain your weight.                                                            |  |  |
| 25. In <u>the first month</u> after the operation, diet restrictions are generally recommended.                                                                                             |  |  |
| 26. A protein-rich diet is recommended to increase the body's resistance.                                                                                                                   |  |  |
| 27. You should not eat margarine, mayonnaise, cream, pickles, and fries.                                                                                                                    |  |  |
| 28. Dishes to be consumed should be low-fat, low-salt, boiled, or grilled.                                                                                                                  |  |  |
| 29. Dried legumes (chickpeas, haricot beans, lentils, etc.) should not be consumed.                                                                                                         |  |  |
| 30. Tea consumption should be limited to 2-3 cups daily, and it should be weak tea. Coffee consumption should be limited to 1 cup daily.                                                    |  |  |
| <b>WATER INTAKE</b>                                                                                                                                                                         |  |  |
| 31. Fluids should be restricted.                                                                                                                                                            |  |  |
| 32. You should not drink water regularly.                                                                                                                                                   |  |  |
| 33. Water improves kidney function and significantly reduces the risk of infection.                                                                                                         |  |  |
| 34. Water is essential for the removal of harmful toxins from the body.                                                                                                                     |  |  |
| <b>ELIMINATION</b>                                                                                                                                                                          |  |  |
| 35. If the home toilet is a squat toilet, you should use a patient toilet chair to avoid difficulty in sitting and getting up.                                                              |  |  |
| 36. If you are using the commode toilet, it will not affect you if it is too high or too low.                                                                                               |  |  |
| 37. In order not to fall while sitting on the toilet, there should be handles, and their strength should be checked.                                                                        |  |  |

|                                                                                                                                      |  |  |
|--------------------------------------------------------------------------------------------------------------------------------------|--|--|
|                                                                                                                                      |  |  |
| 38. For regular defecation, it should not be a habit to go to the toilet at a certain time every day, even if you do not need it.    |  |  |
| 39. Care should be taken to avoid constipation.                                                                                      |  |  |
| 40. If constipation is present, medication should not be used to treat it.                                                           |  |  |
| <b>RIB CAGE PROTECTION</b>                                                                                                           |  |  |
| 41. The use of a "chest corset" or "chest pillow" does not affect the healing process.                                               |  |  |
| 42. In patients using a corset, the opening caused by movements in the chest bones and infections related to this are very unlikely. |  |  |
| 43. There is no need to use a corset of the appropriate size.                                                                        |  |  |
| 44. During the first 20 days/1 month after surgery, help should not be obtained while sitting and getting up.                        |  |  |
| 45. The patient should not lie on their left or right side for 6 weeks.                                                              |  |  |
| 46. A cough exercise should be done by supporting the chest bone with the chest pillow at the time of coughing.                      |  |  |
| 47. The chest corset should not be removed even while resting.                                                                       |  |  |
| <b>BATH AND HYGIENIC CARE</b>                                                                                                        |  |  |
| 48. There is no need to have someone help you with your first bathroom experience at home after the surgery.                         |  |  |
| 49. Care must be taken not to be left alone in the bathroom for the first month.                                                     |  |  |
| 50. A non-slip rubber mat or self-adhesive non-slip mat should be placed on the bathtub or shower floor.                             |  |  |
| 51. There is no need to make grab bars / iron rods to avoid slipping in the bathroom.                                                |  |  |
| 52. Bath / shower should be done without rubbing the wound with products such as pouch and fiber.                                    |  |  |
| 53. After the bath, cream or lotion should be applied to the surgical incision sites.                                                |  |  |
| 54. The incision site does not need to be kept clean and dry.                                                                        |  |  |
| 55. A bath in the form of a standing shower should be taken, and a bath in the bathtub should not be.                                |  |  |
| 56. A handheld showerhead should not be used in the bathroom.                                                                        |  |  |
| 57. The surgery site should not be rubbed.                                                                                           |  |  |
| 58. While bathing, very hot water should be used.                                                                                    |  |  |

|                                                                                                                                  |  |  |
|----------------------------------------------------------------------------------------------------------------------------------|--|--|
| 59. A bath should be taken every two days.                                                                                       |  |  |
| 60. There is no need to hold onto the handlebars in order to avoid falls.                                                        |  |  |
| 61. The floors should be dried with a long-handled mat when wet.                                                                 |  |  |
| <b>COMPRESSION SOCKS</b>                                                                                                         |  |  |
| 62. In cardiac surgery, if a vein is removed from the leg, it is recommended to wear compression (varicose) socks after surgery. |  |  |
| 63. Compression socks do not need to fit according to the patient's weight and height.                                           |  |  |
| 64. In the first month, someone else should dress you to protect the chest bone.                                                 |  |  |
| 65. There should be no wrinkles, gathering, or folding of the socks.                                                             |  |  |
| 66. The use of compression socks does not reduce edema in the legs.                                                              |  |  |
| 67. Compression socks should be worn only on the leg that the vein was taken from.                                               |  |  |
| 68. Compression socks are not used after surgery.                                                                                |  |  |
| 69. Compression socks should be taken off before going to bed. They should be put on again first thing in the morning.           |  |  |
| 70. Compression socks should not be cleaned when taken off before going to bed.                                                  |  |  |
| <b>PHYSICAL EXERCISES</b>                                                                                                        |  |  |
| 71. Straight paths are best for walking.                                                                                         |  |  |
| 72. There is no need to wear comfortable clothes and shoes for the walk.                                                         |  |  |
| 73. Walking should be done in very warm weather                                                                                  |  |  |
| 74. Walking should be done in windy weather.                                                                                     |  |  |
| 75. You should stop and rest when you are tired.                                                                                 |  |  |
| 76. CABG patients should not climb stairs.                                                                                       |  |  |
| 77. While climbing stairs, you should rest after every several steps.                                                            |  |  |
| 78. When climbing the stairs, use the handrails for assistance in the first 2 months after surgery.                              |  |  |
| 79. Exercise should be interrupted or ended if you experience palpitations, difficulty breathing, or fatigue.                    |  |  |
| <b>ALCOHOL/TOBACCO USE</b>                                                                                                       |  |  |

|                                                                                                                                                                                       |  |  |
|---------------------------------------------------------------------------------------------------------------------------------------------------------------------------------------|--|--|
| 80. Smoking is allowed 1 month after surgery.                                                                                                                                         |  |  |
| 81. You should not drink alcohol for 3 months after surgery.                                                                                                                          |  |  |
| <b>RETURNING TO WORK</b>                                                                                                                                                              |  |  |
| 82. Readiness to return to work should be determined according to the type of work performed.                                                                                         |  |  |
| 83. More sedentary work that only requires use of arms and hands can be started before the 3rd month after surgery.                                                                   |  |  |
| <b>SOCIAL ACTIVITIES</b>                                                                                                                                                              |  |  |
| 84. Housework can be done immediately after surgery.                                                                                                                                  |  |  |
| 85. You should travel in the back seat of the car and support your chest with a pillow.                                                                                               |  |  |
| 86. It is not necessary to take breaks during long car trips.                                                                                                                         |  |  |
| 87. Patients should not travel by plane immediately after surgery.                                                                                                                    |  |  |
| 88. On long flights, short walks should be taken in the corridor of the plane.                                                                                                        |  |  |
| 89. Visitors should be accepted after surgery.                                                                                                                                        |  |  |
| <b>SEXUAL LIFE</b>                                                                                                                                                                    |  |  |
| 90. A healthy sex life is not part of returning to normal life after cardiac surgery.                                                                                                 |  |  |
| 91. It may take some time to feel sexual pleasure, but when sexual desire returns, sexuality should be given importance, and feelings and concerns should be shared with the partner. |  |  |
| 92. The amount of energy required for sexual intercourse is normally the same as the speed of climbing two floors of stairs.                                                          |  |  |
| 93. A comfortable sex position should be found, and positions where your arms support your body weight should be avoided.                                                             |  |  |
| <b>POST-OPERATIVE DRUG USE</b>                                                                                                                                                        |  |  |
| 94. Patients who have had heart valve surgery should use the drug called Coumadin for the rest of their lives.                                                                        |  |  |
| 95. Coumadin should not be used regularly.                                                                                                                                            |  |  |
| 96. If you forget to take your Coumadin, it should be taken as soon as you remember.                                                                                                  |  |  |
| 97. If you forget to take your Coumadin, you should take 2 more on the next day.                                                                                                      |  |  |
| 98. Coumadin can be stopped without asking your doctor.                                                                                                                               |  |  |
| 99. When you visit a dentist or other doctor, you must tell them that you are taking Coumadin.                                                                                        |  |  |

|                                                                                                                 |  |  |
|-----------------------------------------------------------------------------------------------------------------|--|--|
| 100. When using Coumadin, other medicines should not be used without asking your doctor.                        |  |  |
| 101. It is not necessary to carry a card indicating that you are using Coumadin in your wallet for your safety. |  |  |
| 102. Coumadin is not affected by sudden dietary changes.                                                        |  |  |
| 103. Vitamin K reduces the effects of Coumadin.                                                                 |  |  |
| 104. Grapefruit reduces the effects of Coumadin.                                                                |  |  |

**CONSORT 2010 checklist of information to include when reporting a randomised trial\***

| Section/Topic             | Item No | Checklist item                                                                                                                        | Reported on page No |
|---------------------------|---------|---------------------------------------------------------------------------------------------------------------------------------------|---------------------|
| <b>Title and abstract</b> | 1a      | Identification as a randomised trial in the title                                                                                     | Page 1              |
|                           | 1b      | Structured summary of trial design, methods, results, and conclusions (for specific guidance see CONSORT for abstracts)               | <u>Page 1</u>       |
| <b>Introduction</b>       | 2a      | Scientific background and explanation of rationale                                                                                    | Page 2              |
| Background and objectives | 2b      | Specific objectives or hypotheses                                                                                                     | Page 2              |
| <b>Methods</b>            |         |                                                                                                                                       |                     |
| Trial design              | 3a      | Description of trial design (such as parallel, factorial) including allocation ratio                                                  | <u>Page 2-3-4</u>   |
|                           | 3b      | Important changes to methods after trial commencement (such as eligibility criteria), with reasons                                    | Page 2-3-4          |
| Participants              | 4a      | Eligibility criteria for participants                                                                                                 | Page 2-3-4          |
|                           | 4b      | Settings and locations where the data were collected                                                                                  | Page 2-3-4          |
| Interventions             | 5       | The interventions for each group with sufficient details to allow replication, including how and when they were actually administered | Page 2-3-4          |
| Outcomes                  | 6a      | Completely defined pre-specified primary and secondary outcome measures, including how and when they were assessed                    | Page 2-3-4          |
|                           | 6b      | Any changes to trial outcomes after the trial commenced, with reasons                                                                 | <u>N/A</u>          |
| Sample size               | 7a      | How sample size was determined                                                                                                        | Page 3              |

|                                                      |     |                                                                                                                                                                                             |                   |
|------------------------------------------------------|-----|---------------------------------------------------------------------------------------------------------------------------------------------------------------------------------------------|-------------------|
|                                                      | 7b  | When applicable, explanation of any interim analyses and stopping guidelines                                                                                                                | <u>Page 2-3-4</u> |
| <b>Randomisation:</b>                                |     |                                                                                                                                                                                             |                   |
| Sequence generation                                  | 8a  | Method used to generate the random allocation sequence                                                                                                                                      | Page 2-3-4        |
|                                                      | 8b  | Type of randomisation; details of any restriction (such as blocking and block size)                                                                                                         | <u>Page 2-3-4</u> |
| Allocation concealment mechanism                     | 9   | Mechanism used to implement the random allocation sequence (such as sequentially numbered containers), describing any steps taken to conceal the sequence until interventions were assigned | Page 2-3-4        |
| Implementation                                       | 10  | Who generated the random allocation sequence, who enrolled participants, and who assigned participants to interventions                                                                     | Page 2-3-4        |
| Blinding                                             | 11a | If done, who was blinded after assignment to interventions (for example, participants, care providers, those assessing outcomes) and how                                                    | Page 2-3-4-8      |
|                                                      | 11b | If relevant, description of the similarity of interventions                                                                                                                                 | -                 |
| Statistical methods                                  | 12a | Statistical methods used to compare groups for primary and secondary outcomes                                                                                                               | Page 5            |
|                                                      | 12b | Methods for additional analyses, such as subgroup analyses and adjusted analyses                                                                                                            | Page 5            |
| <b>Results</b>                                       |     |                                                                                                                                                                                             |                   |
| Participant flow (a diagram is strongly recommended) | 13a | For each group, the numbers of participants who were randomly assigned, received intended treatment, and were analysed for the primary outcome                                              | Page 5-6          |
|                                                      | 13b | For each group, losses and exclusions after randomisation, together with reasons                                                                                                            | N/A               |
| Recruitment                                          | 14a | Dates defining the periods of recruitment and follow-up                                                                                                                                     | Page 5-6          |
|                                                      | 14b | Why the trial ended or was stopped                                                                                                                                                          | Page 5-6          |



|                          |     |                                                                                                                                                   |                   |
|--------------------------|-----|---------------------------------------------------------------------------------------------------------------------------------------------------|-------------------|
| Baseline data            | 15  | A table showing baseline demographic and clinical characteristics for each group                                                                  | Page5-6           |
| Numbers analysed         | 16  | For each group, number of participants (denominator) included in each analysis and whether the analysis was by original assigned groups           | Page 5-6          |
| Outcomes and estimation  | 17a | For each primary and secondary outcome, results for each group, and the estimated effect size and its precision (such as 95% confidence interval) | Page5-6           |
|                          | 17b | For binary outcomes, presentation of both absolute and relative effect sizes is recommended                                                       | <u>Page 5-6</u>   |
| Ancillary analyses       | 18  | Results of any other analyses performed, including subgroup analyses and adjusted analyses, distinguishing pre-specified from exploratory         | Page 5-6          |
| Harms                    | 19  | All important harms or unintended effects in each group (for specific guidance see CONSORT for harms)                                             | <u>N/A</u>        |
| <b>Discussion</b>        |     |                                                                                                                                                   |                   |
| Limitations              | 20  | Trial limitations, addressing sources of potential bias, imprecision, and, if relevant, multiplicity of analyses                                  | <u>Page 8</u>     |
| Generalisability         | 21  | Generalisability (external validity, applicability) of the trial findings                                                                         | <u>Page 8</u>     |
| Interpretation           | 22  | Interpretation consistent with results, balancing benefits and harms, and considering other relevant evidence                                     | <u>Page 6-7-8</u> |
| <b>Other information</b> |     |                                                                                                                                                   | Page 4            |
| Registration             | 23  | Registration number and name of trial registry                                                                                                    |                   |
| Protocol                 | 24  | Where the full trial protocol can be accessed, if available                                                                                       | N/A               |
| Funding                  | 25  | Sources of funding and other support (such as supply of drugs), role of funders                                                                   | N/A               |
